# Supplementary material
Source: HighWire-hosted journal article supplement (https://bmjopen.bmj.com/content/11/11/e052748)
Supplement: inline-supplementary-material-2 [file inline-supplementary-material-2.pdf]

|                                                                                                                                                                                                                                                                                                                                                                                                                                    |                                                                                      |                         |
|------------------------------------------------------------------------------------------------------------------------------------------------------------------------------------------------------------------------------------------------------------------------------------------------------------------------------------------------------------------------------------------------------------------------------------|--------------------------------------------------------------------------------------|-------------------------|
|                                                                                                                                                                                                                                                                                                                                                   | <b>FOREST</b><br><b>Health and Sexuality of Transmasculine</b><br><b>Individuals</b> | Version 1<br>25/03/2021 |
| Interview guide : Key Informant – FOREST                                                                                                                                                                                                                                                                                                                                                                                           |                                                                                      |                         |
| <div style="display: flex; justify-content: space-around; align-items: center;">     </div> |                                                                                      |                         |

### Consent:

«As part of the ethical and regulations process, we need to ask you if you consent to take part in the study. Do you agree to participate and have this interview recorded and archived? »

### Career path:

Studies, diplomas, qualifications

Beginning of the career path, benchmarks, and activist activity

### Professional experience of transidentity:

How did you come to work with trans people? When was it?

Had you been trained on trans issues before meeting trans people/patients?

If yes, which training did you receive?

What were your first impressions when working with trans people? (emotions)

Today, what percentage of your work is dedicated to trans people?

Do you feel you are overwhelmed?

Do you feel that all your colleagues are able to receive trans/masculine people?

### Transidentity:

Familiarity with/socialisation with trans people (do you know any trans people outside of your work ?)

How did you find out about trans issues? Do you frequent a network of professionals? A formal or informal peer group?

Did you know that you are referred on trans networks?

How does it feel to know this?

What does it mean to you?

Do you have an activist commitment? If so, which one?

### Transmasculine people:

What is the proportion of transmasculine people you see?

What are the profiles of the transmasculine people you work with?

Do they differ from transfeminine/cisgender people? Are there any specific issues that these people may face?

If so, which ones?

### Transmasculine people and sexual health:

Do you discuss the issue of sexual health with the transmasculine people you meet?

Is this an issue that they spontaneously raise? Do they seem comfortable?

Could you list the main issues you note about transmasculine sexual health from your perspective?

Have you ever read any specific content on transmasculine sexual health?

Content produced by associations? Or activists?

Academic/scientific content?

If so, what have you learned from them?

In your opinion, what elements can impact the sexual health of transmasculine people?

Do your reflections on trans men also apply to non-binary AFAB people? Are there issues specific to them?

### Recommendations:

As a result of this discussion, what would be your recommendations, to better support transmasculine people regarding sexual health issues?

Do you feel that you have learned from trans people? If so, on what subjects?

What subjects do you consider to be insufficiently covered today?

What training would you have liked to receive?

### Closure:

Why did you accept this interview?

Are there any questions, any point that have been left out and that you would like to discuss?

### To keep in mind during the interview:

- General health status,
- Mental health, disability,
- Violence and victimisation,
- Stigma and discrimination,
- Substance use
- Sexual and reproductive health.

### Demographic data:

1. Year of birth: .....
2. Department of birth: .....
3. Current department of living: .....
4. Parents' occupation:
  - Father / Parent 1: .....
  - Mother/ Parent 2: .....
5. How do you describe your gender?
  - Man
  - Woman
  - Non binary
  - I use another term : .....
  - I prefer not to answer
6. At birth, you were recorded as:
  - Male
  - Female
  - I prefer not to answer
7. Were you born with a variation of sex characteristics?
  - Yes
  - No
  - I prefer not to answer
8. How do you describe your sexual orientation?
  - Lesbian, gay or homosexual
  - Heterosexual
  - Bisexual
  - Queer
  - I use another term: .....
  - I prefer not to answer
